# Supplementary material
Source: Elsevier journal article supplement (https://www.sciencedirect.com/science/article/pii/S1888429620301230)

**Supplementary Figure A.1**: Summary of intrasession Coefficient of Variation (CV) of the PIPR metrics with blue and red light for 1 s stimulus (*top*) and 5 s stimulus (*bottom*) durations. Metrics include peak constriction, 6 s and 30 s post-illumination pupil response (PIPR), and early and late area under the curve (AUC).


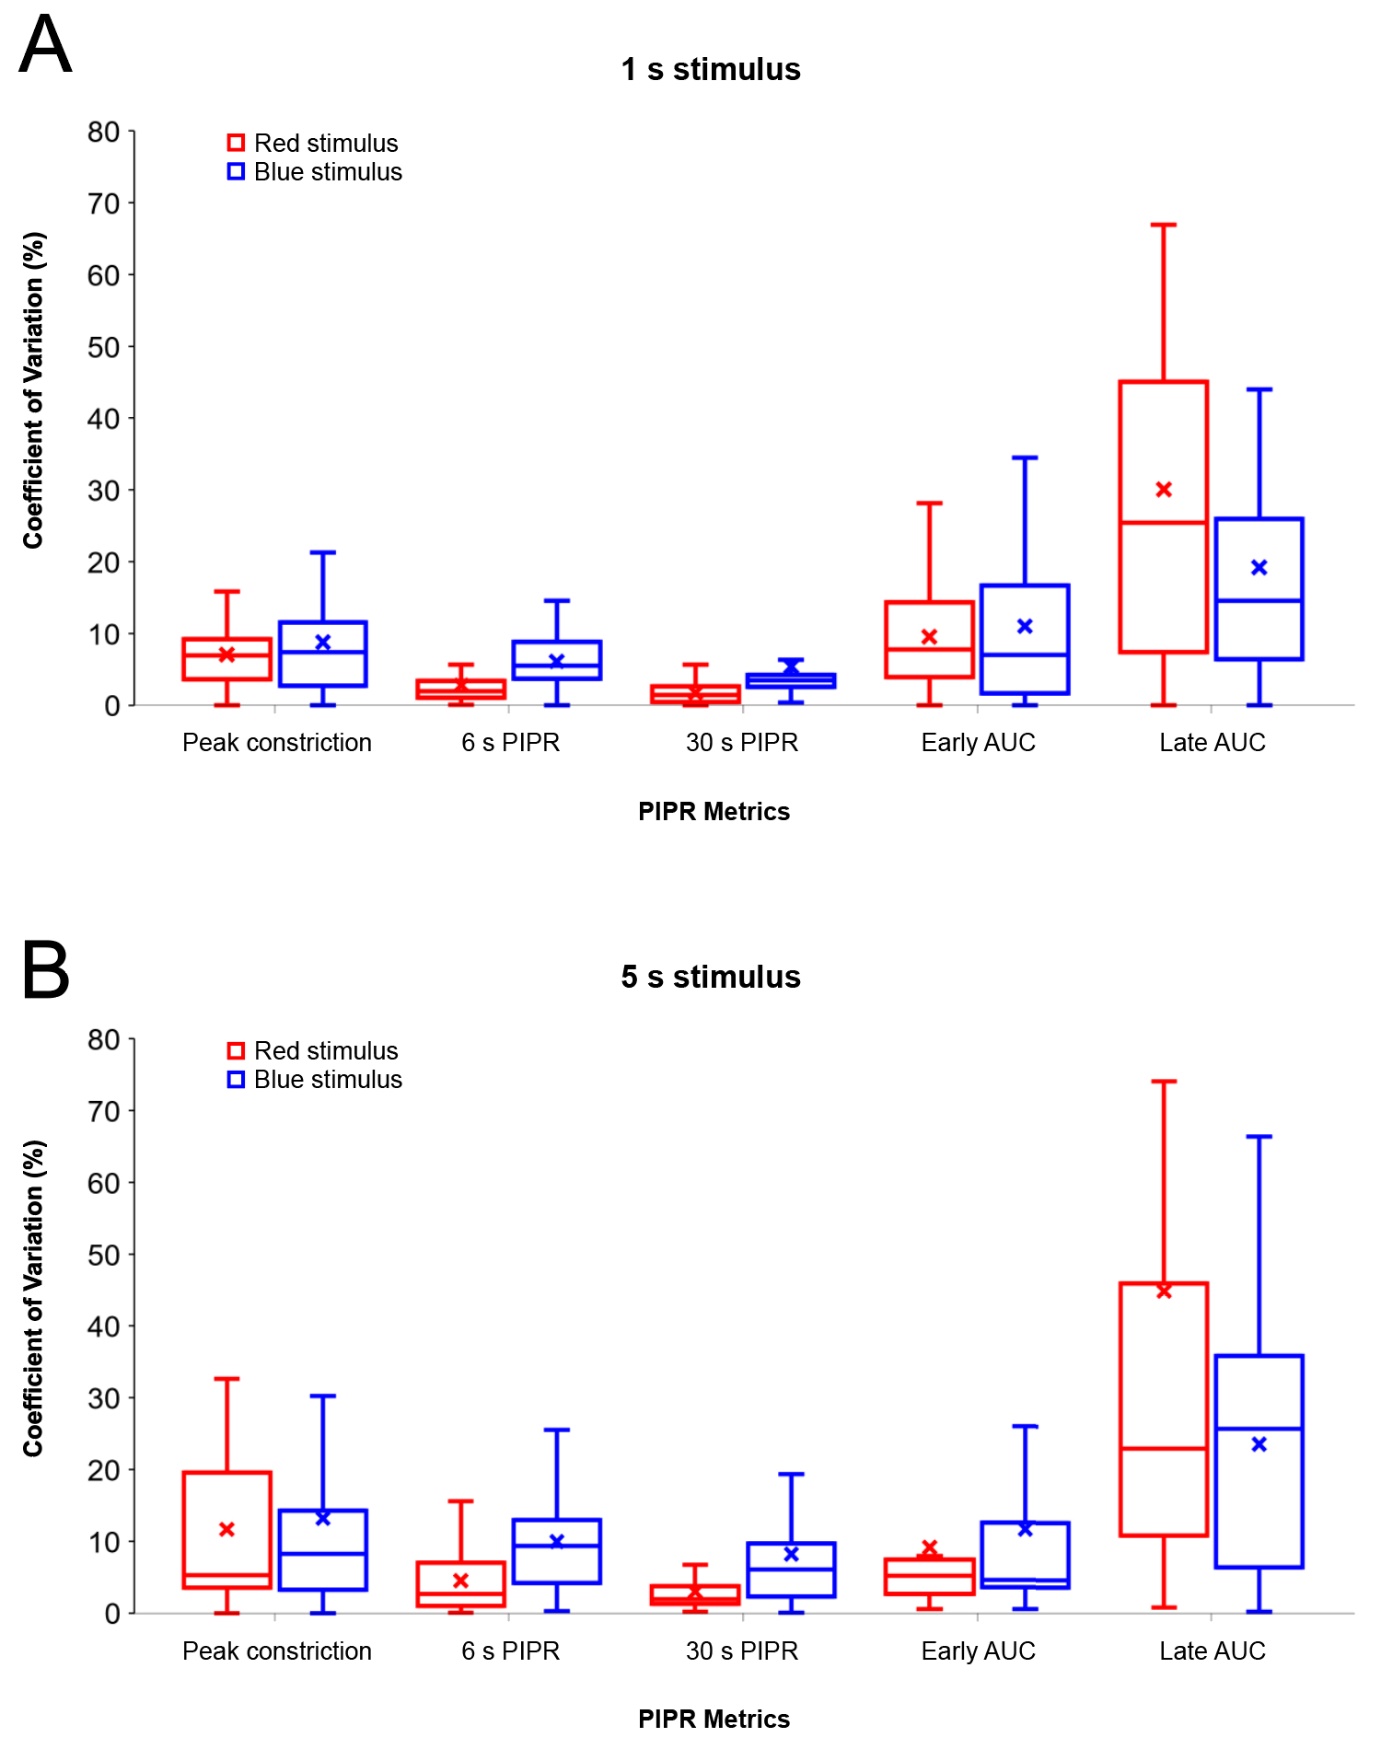

Supplement: mmc1 [file S1888429620301230:mmc1.docx]
